# Supplementary material for: Abnormal spatial heterogeneity governing the charge-carrier mechanism in efficient Ruddlesden–Popper perovskite solar cells
Source: Royal Society of Chemistry journal article supplement (doi:10.1039/d1ee00984b), 2021-01-01
Supplement: d1ee00984b1.pdf [file d1ee00984b1.pdf]

## Electronic Supplementary Information

### **Abnormal spatial heterogeneity governing charge-carrier mechanism in efficient Ruddlesden–Popper perovskite solar cells**

Jun Xi,<sup>\*ac,‡</sup> Junseop Byeon,<sup>ab,‡</sup> Unsoo Kim,<sup>ab,‡</sup> Kijoon Bang,<sup>ab,‡</sup> Gi Rim Han,<sup>d</sup> Ji-Young Kim,<sup>e</sup> Jungjin Yoon,<sup>f</sup> Hua Dong,<sup>g</sup> Zhaoxin Wu,<sup>g</sup> Giorgio Divitini,<sup>h</sup> Kai Xi,<sup>h</sup> Jinwoo Park,<sup>i</sup> Tae-Woo Lee,<sup>ij</sup> Seong Keun Kim,<sup>d</sup> Mansoo Choi<sup>ab</sup> and Jong Woo Lee<sup>\*k</sup>

This file includes:

Part 1. Fitting results

Part 2. Tables S1-S5

Part 3. Fig. S1-S22

References

## Part 1. Fitting results in main text

### 1. The radiative recombination rate ( $k_{\text{rad}}$ ) and nonradiative recombination rates ( $k_{\text{nonrad}}$ )

The PL quantum yield (PLQY) is defined as the ratio of the radiative recombination rate ( $k_{\text{rad}}$ ) and the total recombination rate ( $k_{\text{tot}}$ )<sup>1</sup>,

$$\text{PLQY} = k_{\text{rad}} / k_{\text{tot}} = k_{\text{rad}} / (k_{\text{rad}} + k_{\text{nonrad}}), \quad (1)$$

where  $k_{\text{nonrad}}$  is the nonradiative recombination rate. All PLQY results are summarized in Table S3, while  $k_{\text{tot}}$  values were identified by the exponential fitting of transient PL spectra (TRPL) (Fig. S13).

### 2. The diffusion lengths ( $L$ ) and mobilities ( $\mu$ ) of charge carriers

We analyzed  $L$  and  $\mu$  using the 1D diffusion models and Einstein equations<sup>2</sup>,

$$L \approx 2d / \pi * (2 (\tau / \tau_{\text{quench}} - 1))^{1/2}, \quad (2)$$

$$\mu = L^2 q / (kT \tau) \quad (3)$$

where  $d$  is the film thickness,  $\tau$  is the carrier lifetimes of perovskites,  $\tau_{\text{quench}}$  is the quenched carrier lifetimes of perovskites in transporting layers,  $q$  is the elementary charge,  $k$  is Boltzmann constant, and  $T$  is temperature. All  $d$  values are shown in Fig. S15. Additionally,  $\tau$  and  $\tau_{\text{quench}}$  were estimated from the time-resolved photoluminescence (TRPL) of perovskite layers (Fig. S13), and perovskite layers on transporting layers (Fig. S16). The estimated  $d$  can be found in Fig. S15.

## Part 2. Supplementary tables

Table S1 Different elemental ratios of typical 3D-like (large  $n$ , here  $n = \infty$ ) and 2D-like (small  $n$ , here  $n = 3$ ) phases.

| Element | Ratio (%) in 2D | Ratio (%) in 3D |
|---------|-----------------|-----------------|
| Cs      | 0.145           | 0.255           |
| C       | 9.675           | 1.645           |
| I       | 50.6            | 54.0            |
| Pb      | 28.2            | 33.3            |

Table S2 Statistical distribution of photovoltaic parameters for RPP solar cells using CsFMRP and MRP, respectively.

| N | RPP    | $V_{oc}$ (V) | $J_{sc}$ (mA cm <sup>-2</sup> ) | FF (%)     | PCE (%)    |
|---|--------|--------------|---------------------------------|------------|------------|
| 2 | MRP    | 0.83±0.12    | 2.83±0.15                       | 46.83±4.81 | 1.08±0.11  |
|   | CsFMRP | 1.01±0.03    | 5.38±0.73                       | 38.19±1.46 | 2.09±0.41  |
| 3 | MRP    | 0.71±0.05    | 4.72±0.25                       | 57.43±6.19 | 1.93±0.36  |
|   | CsFMRP | 1.17±0.01    | 14.33±0.26                      | 61.69±1.61 | 10.32±0.45 |
| 4 | MRP    | 1.00±0.03    | 8.45±0.85                       | 51.42±2.43 | 4.36±0.46  |
|   | CsFMRP | 1.16±0.01    | 18.32±0.25                      | 73.37±0.80 | 15.60±0.33 |

Table S3 PLQY of CsFMRP and MRP films, respectively.

| PLQY (%) | CsFMRP | MRP  |
|----------|--------|------|
| n = 2    | 0.706  | 0.17 |
| n = 3    | 10.17  | 3.76 |
| n = 4    | 23.6   | 8.37 |

Table S4 Dynamics of different ground state bleach (GSB) peaks of ultrafast transient absorption (TAS) spectra (Fig. 5c) for MRP and CsFMRP.

| MRP              |                                 |                                   |
|------------------|---------------------------------|-----------------------------------|
| GSB peak         | First rise ( $\text{ps}^{-1}$ ) | Second decay ( $\text{ps}^{-1}$ ) |
| 610 nm (n = 3)   | /                               | 0.039                             |
| 645 nm (n = 4)   | 2.457                           | 0.014                             |
| 675 nm (n = 5)   | 2.231                           | 0.022                             |
| CsFMRP           |                                 |                                   |
| GSB peak         | First rise ( $\text{ps}^{-1}$ ) | Second decay ( $\text{ps}^{-1}$ ) |
| 620 nm (n = 3)   | /                               | 0.031                             |
| 750 nm (3D-like) | 1.243                           | 0.007                             |

Table S5 Composition details of precursor solutions for MRP and CsFMRP, respectively.

| MRP |                          |             |              |
|-----|--------------------------|-------------|--------------|
| n   | PbI <sub>2</sub><br>(mM) | MAI<br>(mM) | PEAI<br>(mM) |
| 2   | 0.85                     | 0.425       | 0.85         |
| 3   | 0.85                     | 0.567       | 0.567        |
| 4   | 0.85                     | 0.6375      | 0.425        |

  

| CsFMRP |                          |                           |             |              |              |                                     |
|--------|--------------------------|---------------------------|-------------|--------------|--------------|-------------------------------------|
| n      | PbI <sub>2</sub><br>(mM) | PbBr <sub>2</sub><br>(mM) | FAI<br>(mM) | MABr<br>(mM) | PEAI<br>(mM) | CsI<br>( $\mu$ L/1 mL) <sup>1</sup> |
| 2      | 0.836                    | 0.051                     | 0.374       | 0.051        | 0.85         | 28.34                               |
| 3      | 0.832                    | 0.068                     | 0.4987      | 0.068        | 0.567        | 37.76                               |
| 4      | 0.83                     | 0.0765                    | 0.561       | 0.0765       | 0.425        | 42.5                                |

<sup>1</sup> Volume of CsI stock solutions for 1 mL CsFMRP precursor solutions. The concentration of CsI stock solutions (in DMSO) is 1.5M.



### Part 3. Supplementary figures

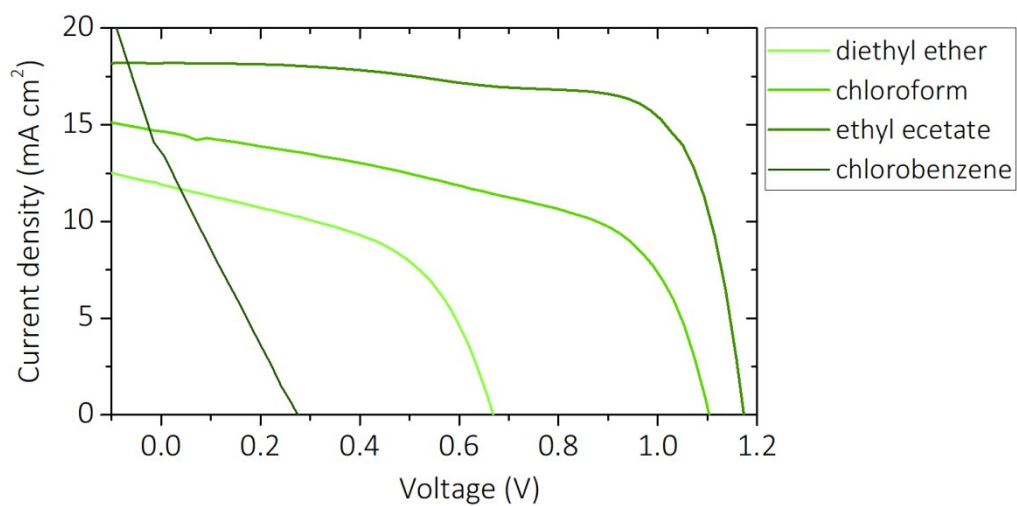

**Fig. S1** J-V curves of typical CsFMRP ( $n = 4$ ) perovskite solar cells driven by selective antisolvent.

Traditional antisolvent chlorobenzene (CB) fails to work due to the bottom thin PTAA layer can partially dissolved by CB.

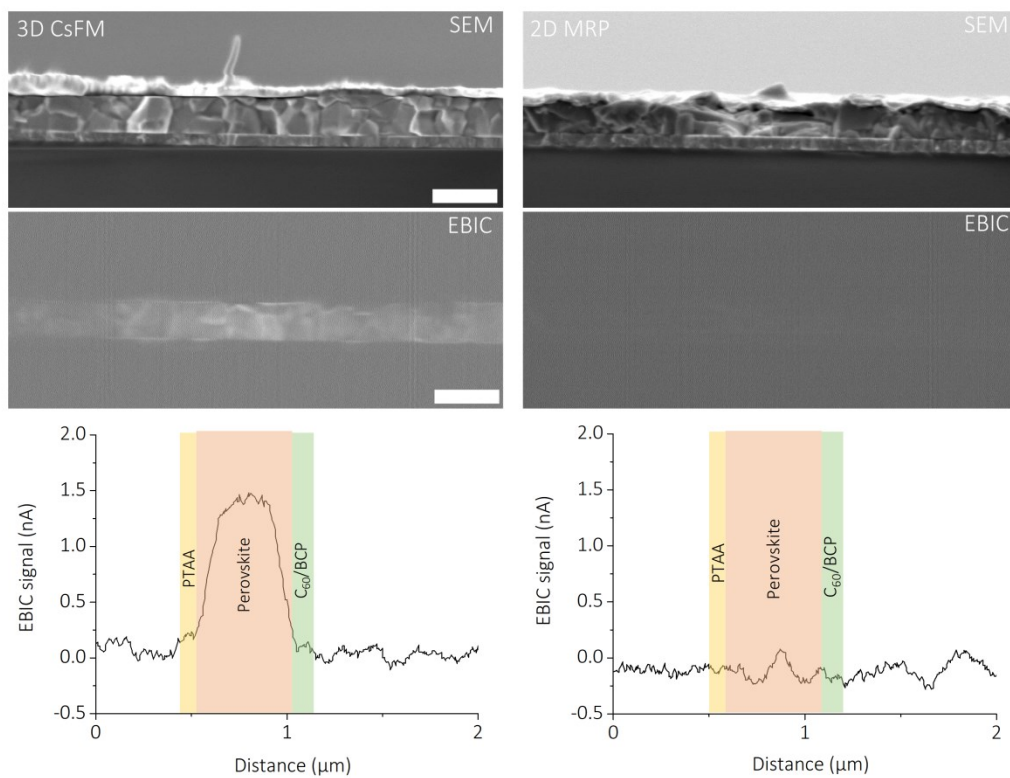

**Fig. S2** Cross sectional SEM and real-time EBIC real time images of 3D triple-cation perovskites (3D CsFM) and 2D MRP ( $n = 4$ ) based solar cells (scale bar: 1  $\mu\text{m}$ ). The bottom images show the depth profile of EBIC signals in corresponding devices.

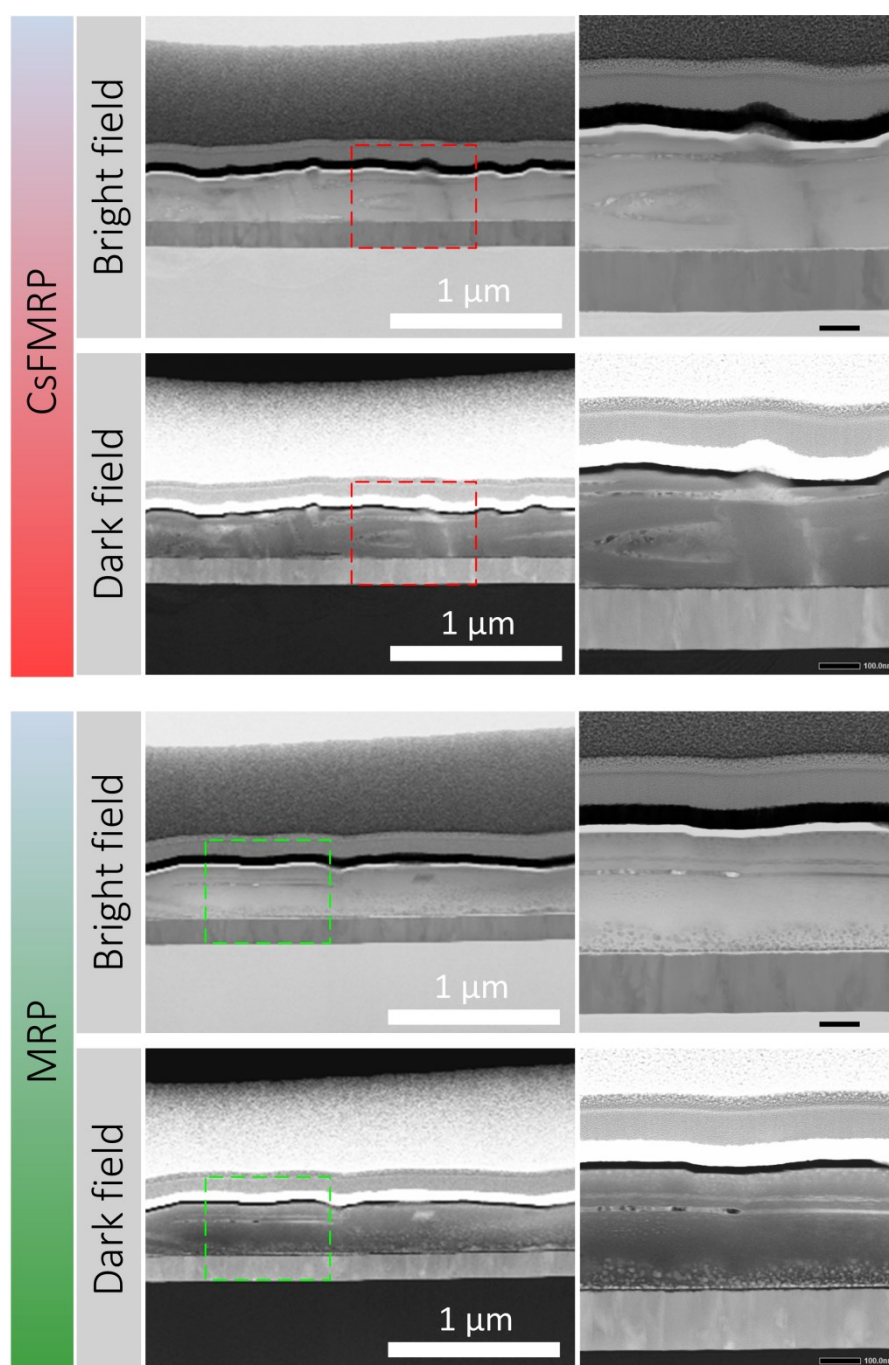

**Fig. S3** Cross sectional TEM images of CsFMRP and MRP based solar cells ((n = 4), scale bar: 100 nm).

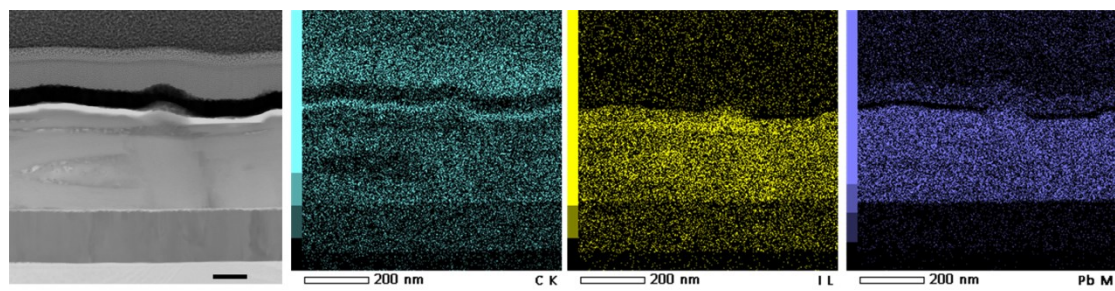

**Fig. S4** Low magnified TEM image and corresponding EDS elemental maps of CsFMRP ( $n = 4$ ).

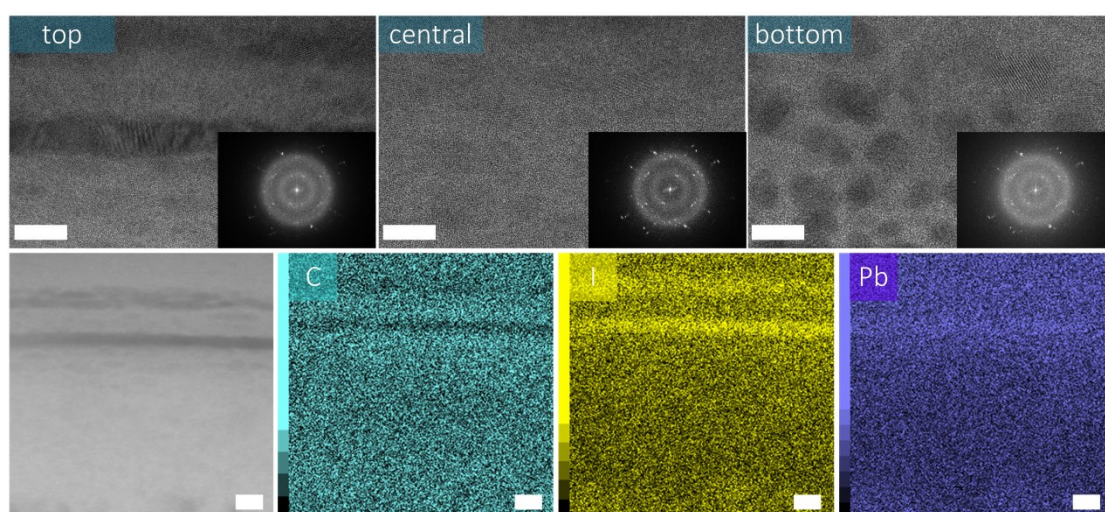

**Fig. S5** High-magnification FIB-HRTEM cross sectional images and corresponding EDS elemental mappings of MRP ( $n = 4$ ) perovskites based solar cells (scale bar: 20 nm).

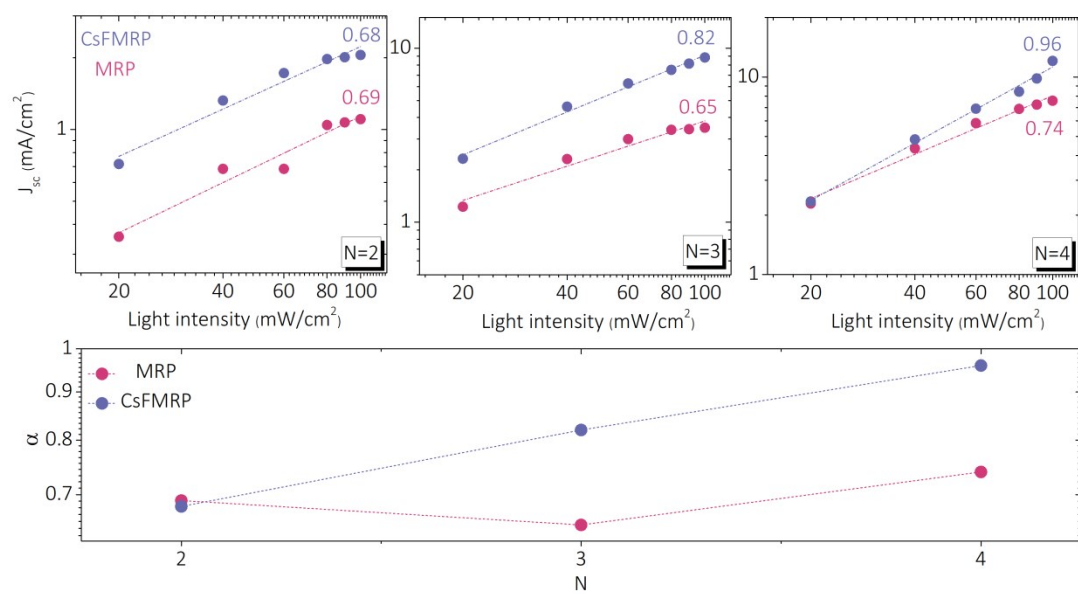

**Fig. S6** Power law dependence factor  $\alpha$  estimated as the slope of linear fitting of  $J_{sc}$  versus  $I_{int}$  (light-intensity).

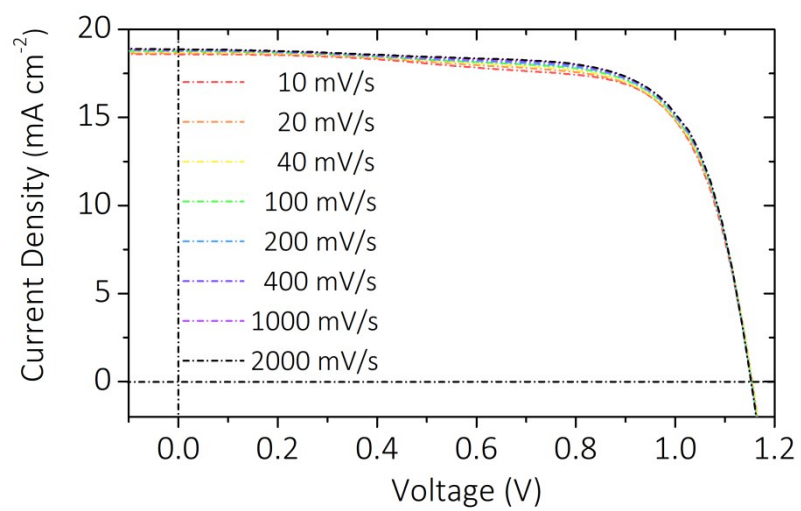

**Fig. S7** J-V curves depending on different scan rates of the champion CsFMRP (n = 4) solar cells.

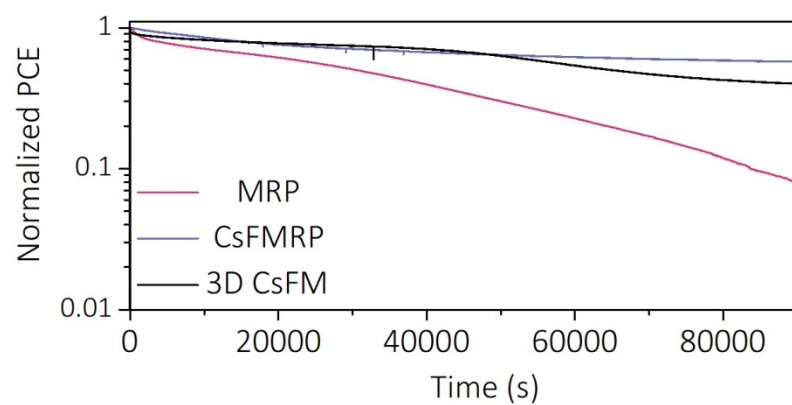

**Fig. S8** Light soaking stabilities of the best devices using 2D CsFMRP, MRP ( $n = 4$ ) and 3D CsFM, respectively.



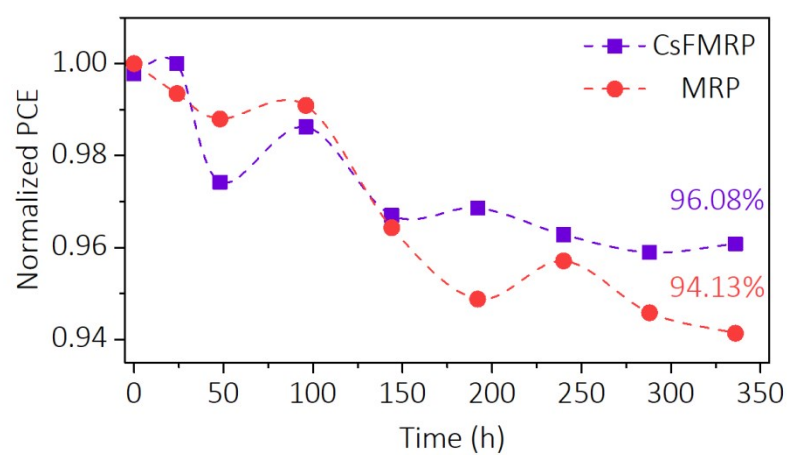

**Fig. S9** Moisture stability of the non-encapsulated devices using CsFMRP and MRP stored in ambient air (~50% humidity).

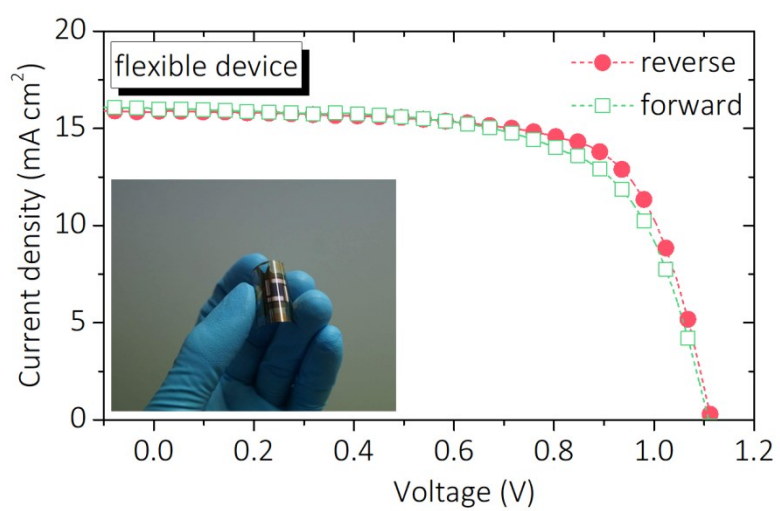

| scan    | $V_{oc}$ (V) | $J_{sc}$ ( $\text{mA/cm}^2$ ) | FF (%) | PCE (%) |
|---------|--------------|-------------------------------|--------|---------|
| reverse | 1.11         | 14.8                          | 69.7   | 11.5    |
| forward | 1.11         | 15.0                          | 65.0   | 10.8    |

**Fig. S10** Champion flexible 2D CsFMRP ( $n = 4$ ) solar cell. Little hysteresis can be found between reverse and forward scan.

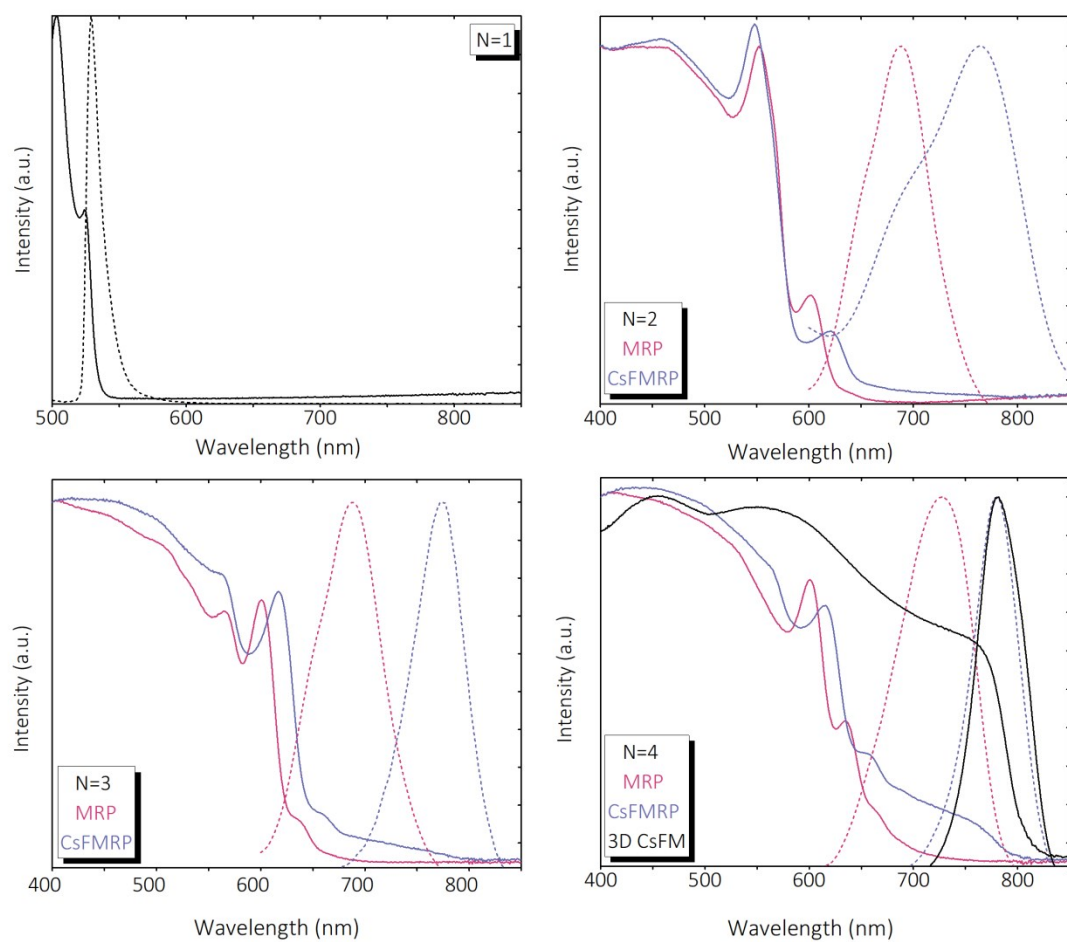

**Fig. S11** UV-Vis absorption and steady-state PL spectra of different RPP films.

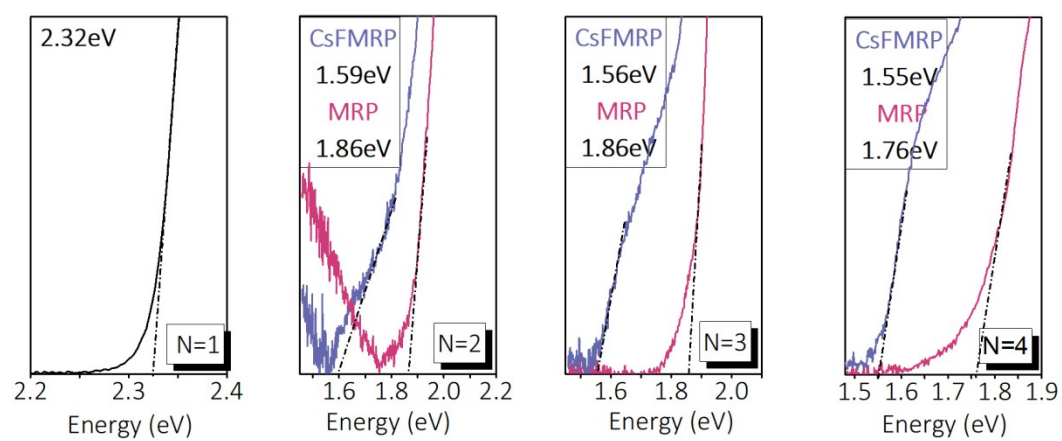

**Fig. S12** Bandgap ( $E_g$ ) fitting from UV-Vis absorption spectra.

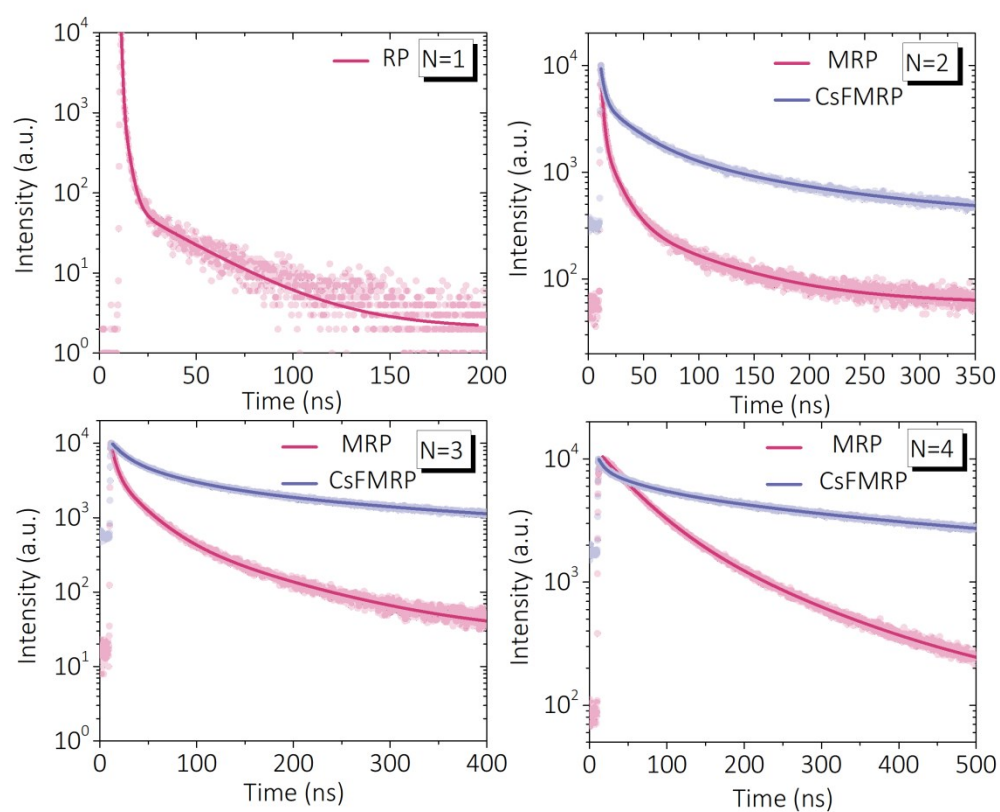

**Fig. S13** Transient PL (TRPL) spectra of different RPP films on quartz. Carrier lifetime ( $\tau$ ) by exponential fitting of corresponding film is summarized as follows,

| $\tau$ (ns) | CsFMRP | MRP    |
|-------------|--------|--------|
| n = 1       | 1.06   |        |
| n = 2       | 38.60  | 10.29  |
| n = 3       | 98.63  | 50.38  |
| n = 4       | 229.40 | 101.04 |

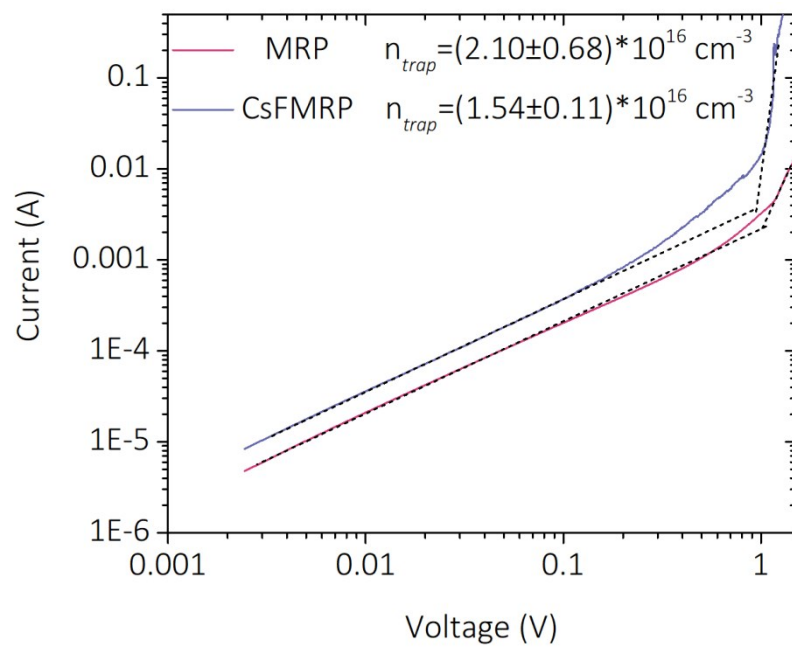

**Fig. S14** Space charge limited charge (SCLC) methods to evaluate the densities of trap states.

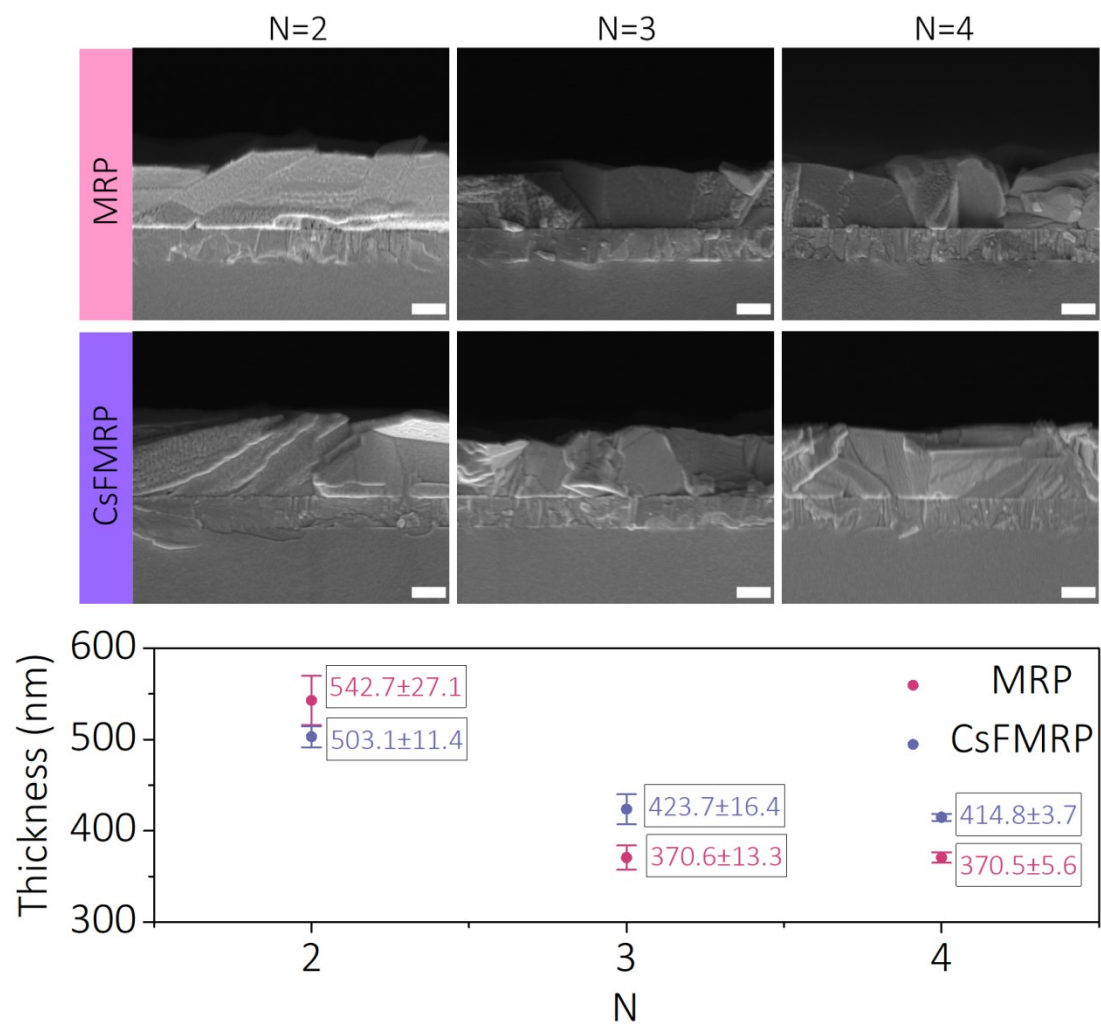

**Fig. S15** Film thicknesses of different RPP films (scale bar: 200 nm).

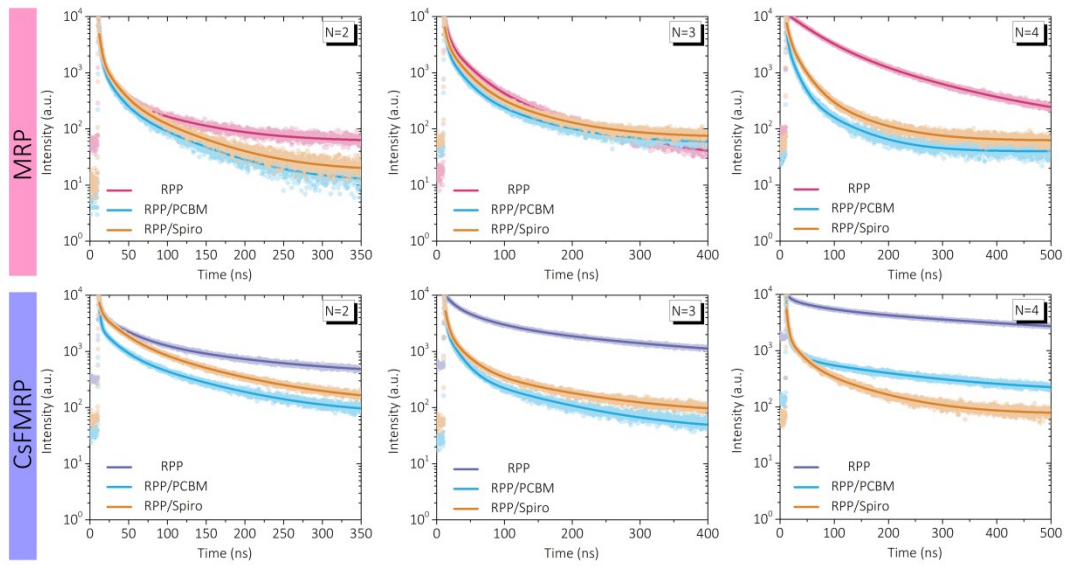

**Fig. S16** TRPL spectra of different perovskites themselves and perovskites on electrons (PCBM) /holes (Spiro-MeOTAD) transporting layers. Quenched carrier lifetime ( $\tau_{\text{quench}}$ ) by exponential fitting of corresponding film on PCBM/Spiro-MeOTAD is summarized as follows,

| $\tau_{\text{quench}}$ on PCBM (ns) | CsFMRP | MRP   |
|-------------------------------------|--------|-------|
| n = 1                               | 1.03   |       |
| n = 2                               | 22.12  | 9.23  |
| n = 3                               | 10.70  | 15.81 |
| n = 4                               | 16.52  | 13.86 |

  

| $\tau_{\text{quench}}$ on Spiro (ns) | CsFMRP | MRP   |
|--------------------------------------|--------|-------|
| n = 1                                | 1.01   |       |
| n = 2                                | 30.8   | 9.56  |
| n = 3                                | 15.3   | 18.89 |
| n = 4                                | 19.13  | 19.16 |



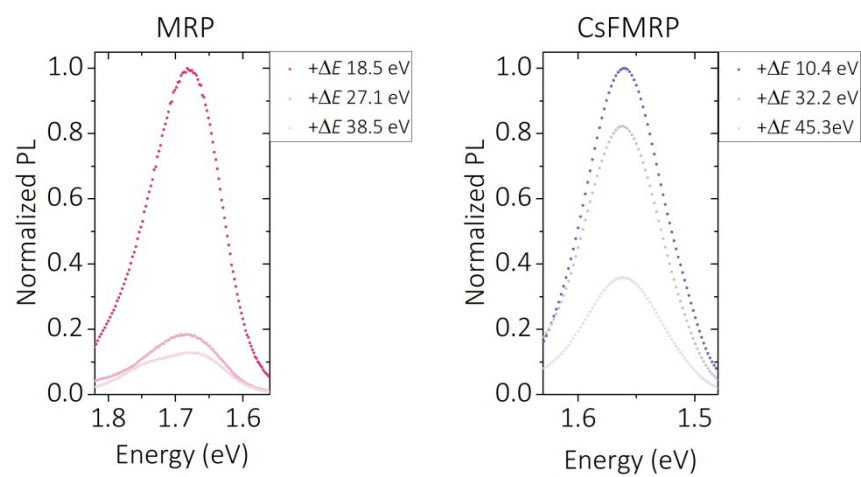

**Fig. S17** Steady state PL spectra of different RPP ( $n = 4$ ) using excess excitation energy beyond electronic band edges.

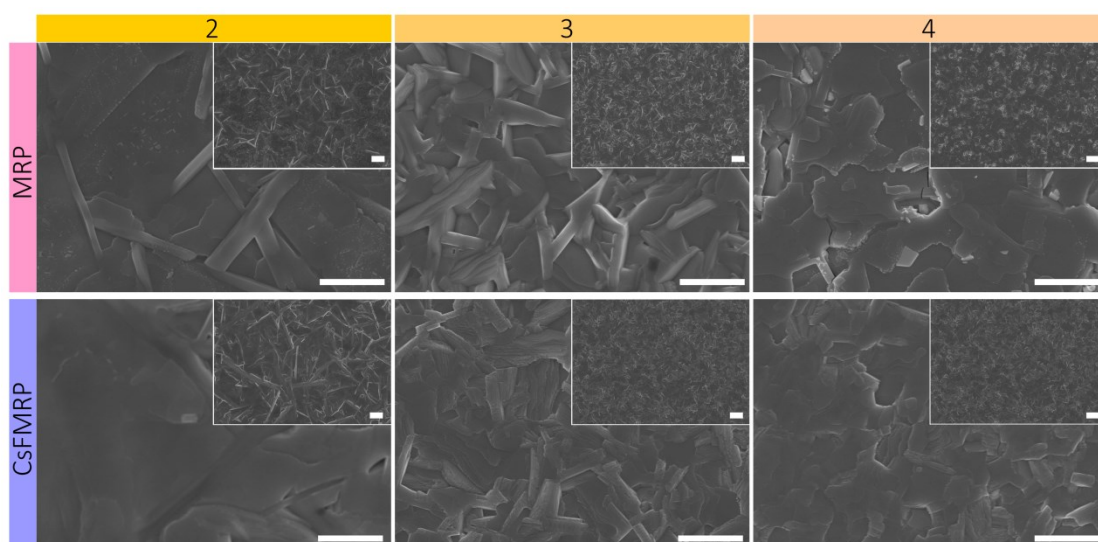

**Fig. S18** Top-view SEM images of corresponding RPP films (scale bar: 1  $\mu\text{m}$  in high magnification, 2  $\mu\text{m}$  in low magnification).

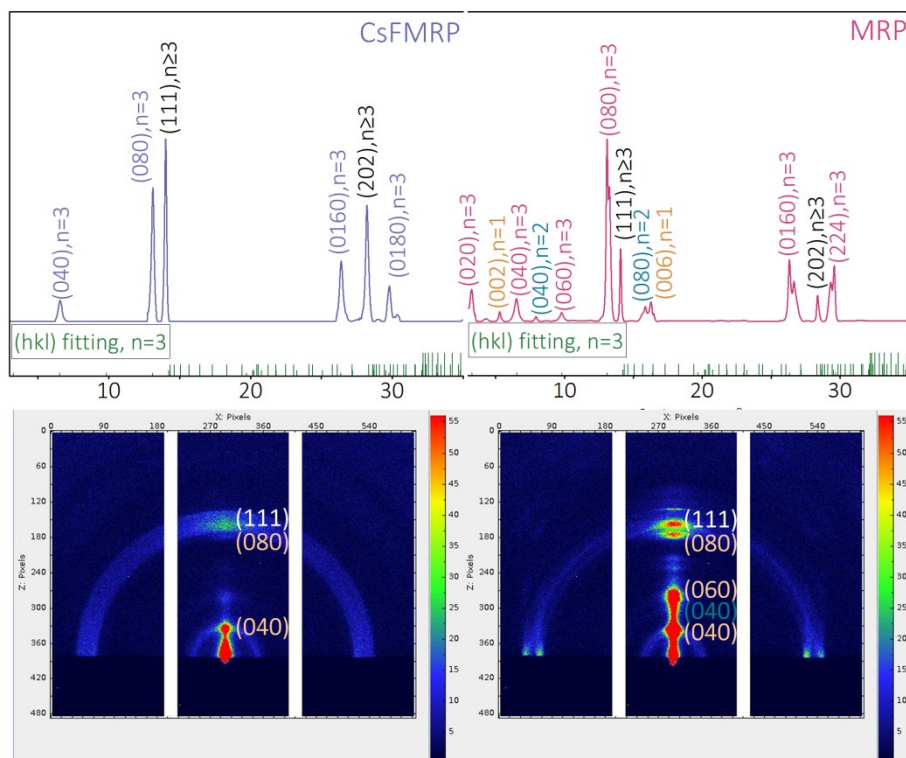

**Fig. S19** XRD and related grazing-incidence wide-angle X-ray scattering (GIWAXS) images of corresponding RPP ( $n = 4$ ) films. In CsFMRP, crystal phase is totally composed of ordered  $n = 3$  phase and 3D-like (large- $n$ ) phase. In contrast, in MRP, crystal phase seems more complicated, composed of  $n = 1, 2, 3$  phases and 3D-like (large- $n$ ) phase.

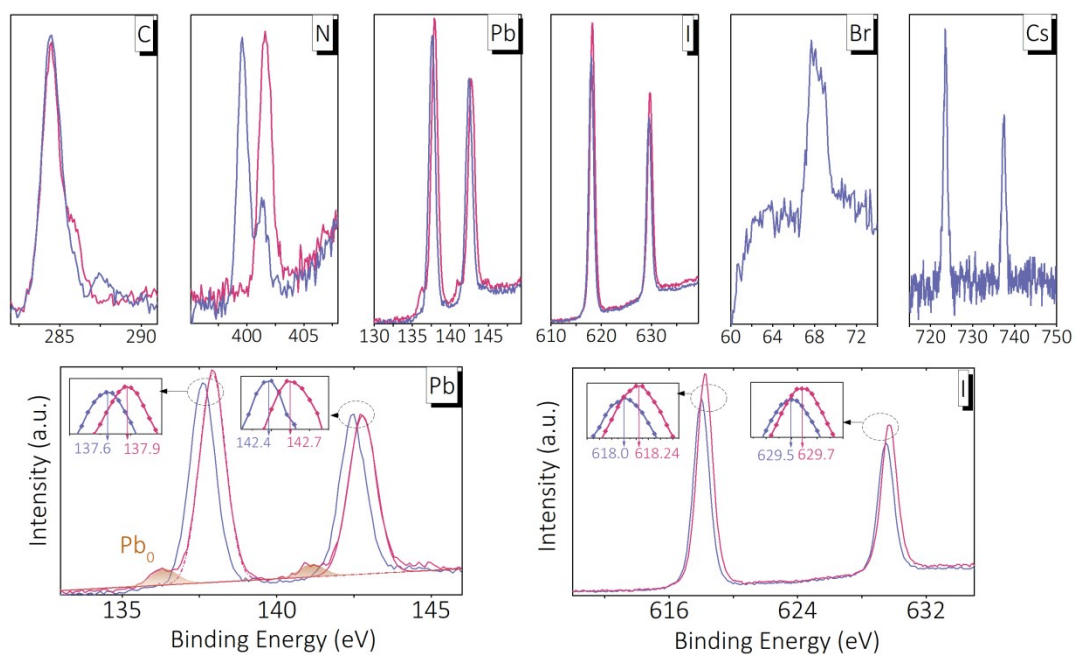

**Fig. S20** XPS spectra of corresponding RPP films ( $n = 4$ ), and detailed  $\text{PbI}_3^-$  cage interaction (red is MRP, blue is CsFMRP).

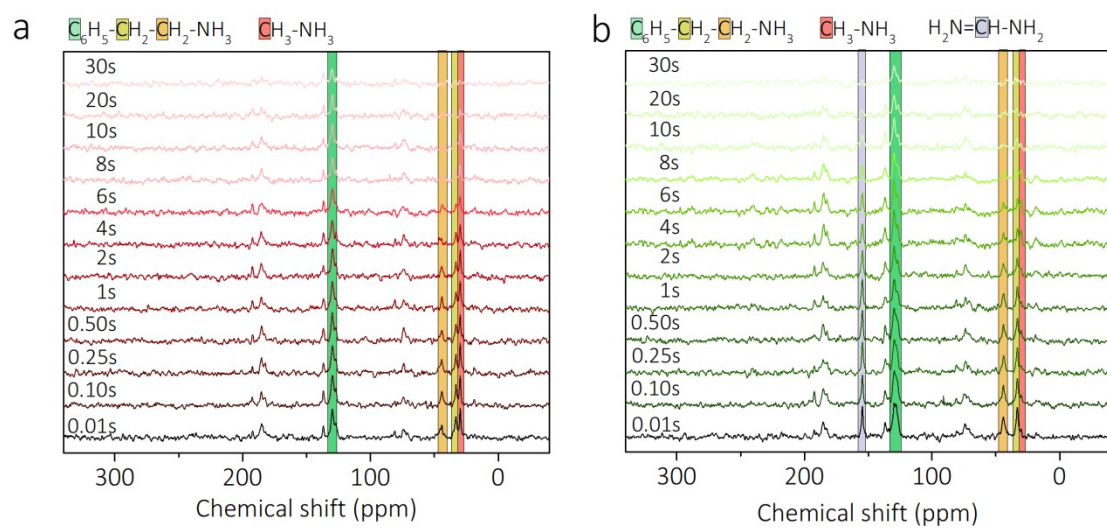

**Fig. S21** Details of  $^{13}\text{C}$  resonances in SSNMR dependent on relaxation time for (a) MRP and (b) CsFMRP.

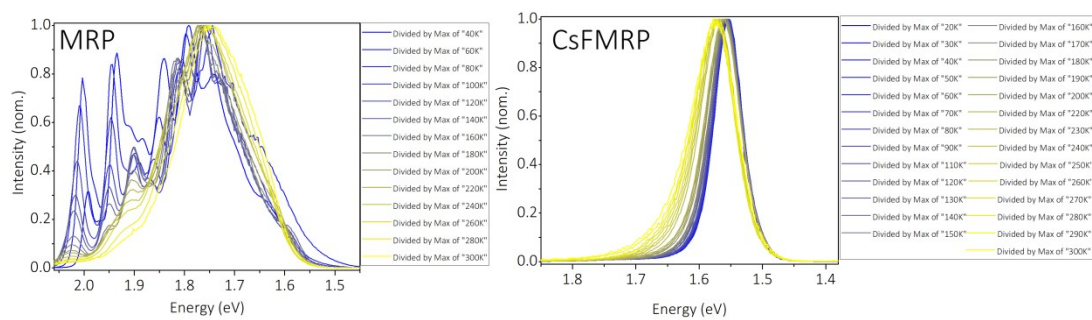

**Fig. S22** Detailed normalized TPL spectra of corresponding RPP ( $n = 4$ ) films.

## References

1. Gong, X. et al. (2018). Electron-phonon interaction in efficient perovskite blue emitters. *Nat. Mater.* *17*, 550–556.
2. Proppe, A. H. et al. (2018). Synthetic control over quantum well width distribution and carrier migration in low-dimensional perovskite photovoltaics. *J. Am. Chem. Soc.* *140*, 2890–2896.
